# Supplementary material for: The Parcels v2.0 Lagrangian framework: new field interpolation schemes
Source: Copernicus journal article supplement (doi:10.5194/gmd-12-3571-2019), 2019-08-19
Supplement: Supplementary file 1 [file gmd-12-3571-2019-supplement.zip]

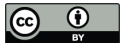

## *Supplement of*

# **The Parcels v2.0 Lagrangian framework: new field interpolation schemes**

**Philippe Delandmeter and Erik van Sebille**

*Correspondence to:* Philippe Delandmeter ([p.b.delandmeter@uu.nl](mailto:p.b.delandmeter@uu.nl))

- [gmd-12-3571-2019-supplement-title-page.pdf](#)
- animations
  - [nemo0083.mp4](#)
  - [nemo0083\\_3d.mp4](#)
  - [nemo0083\\_diff.mp4](#)
  - [nemo0083\\_nws.mp4](#)
  - [nemo0083\\_stokes.mp4](#)
  - [nemo025.mp4](#)

The copyright of individual parts of the supplement might differ from the CC BY 4.0 License.
